# Supplementary material
Source: publisher figshare collection journal article supplement (https://brill.figshare.com/articles/dataset/_/7718207)
Supplement: Supplementary file 1 [file 1]

# **Inferring global species richness from megatranssect data and undetected species estimates**

*Bernhard A. Huber*

Alexander Koenig Research Museum of Zoology, Adenauerallee 160, 53113 Bonn,  
Germany

*b.huber@leibniz-zfmk.de*

*Anne Chao*

Institute of Statistics, National Tsing Hua University, Hsin-Chu, 30043, Taiwan

## **Supplementary material**

|              |                                                                                                                                                                                                                                                                                 |
|--------------|---------------------------------------------------------------------------------------------------------------------------------------------------------------------------------------------------------------------------------------------------------------------------------|
| TABLES S1–S5 | Megatranssect raw data. Species collected on each field day and locality information. Species colour code: yellow = ‘new’ as of the end of 2008 and new in the species list; green = ‘old’ as of the end of 2008 but new in the species list; red = not new in the species list |
|--------------|---------------------------------------------------------------------------------------------------------------------------------------------------------------------------------------------------------------------------------------------------------------------------------|
