# Supplementary material
Source: publisher figshare collection journal article supplement (https://brill.figshare.com/articles/dataset/_/7718207)
Supplement: Supplementary file 2 [file 1]

## TABLES S6–S15

The *Chao2* estimates and the associated 95% confidence intervals of species richness via a log-normal transformation for five regions based on locality by species incidence matrices (tables S6–S10) and date by species incidence matrices (tables S11–S15). In each of tables S6–S15, the *Chao2* estimate is calculated separately for all species data, described species data (formally described before the end of 2008), and undescribed/new species data (not formally described before the end of 2008). The percentages of described and undescribed in each region are determined by the *Chao2* estimates obtained from the described and undescribed species data.  $Q_1$ : number of species detected in only one sampling unit (uniques);  $Q_2$ : number of species detected in only two sampling units (duplicates); the *Chao2* species richness estimator formula is expressed as  $\hat{S}_{Chao2} = S_{obs} + (1 - 1/T) Q_1^2 / (2Q_2)$ , where  $S_{obs}$  denotes the number of observed species in the data, and  $T$  denotes the total number of sampling units (localities or days). 95% C. I.: 95% confidence interval. All numerical results were obtained from the online software SpadeR (Species-richness Prediction And Diversity Estimation in R) available at <https://chao.shinyapps.io/SpadeR/>. The complete incidence-based frequency counts for each sampling region are provided at the end of the supplementary material.

TABLE S6 (South America) The *Chao2* estimates based on locality by species incidence matrix

| South America           | Observed species # | Localities # | $Q_1$ | $Q_2$ | The <i>Chao2</i> estimate<br>(percentage of described/undescribed) | 95% C. I. range |
|-------------------------|--------------------|--------------|-------|-------|--------------------------------------------------------------------|-----------------|
| All species             | 242                | 101          | 141   | 44    | 465.7                                                              | (383.8, 594.8)  |
| Described species       | 62                 | 87           | 23    | 17    | 77.4 (15.10%)                                                      | (67.7, 103.8)   |
| Undescribed/new species | 180                | 95           | 118   | 27    | 435.1 (84.90%)                                                     | (330.7, 612.0)  |

TABLE S7 (Africa) The *Chao2* estimates based on locality by species incidence matrix

| Africa                  | Observed species # | Localities # | $Q_1$ | $Q_2$ | The <i>Chao2</i> estimate<br>(percentage of described/undescribed) | 95% C. I. range |
|-------------------------|--------------------|--------------|-------|-------|--------------------------------------------------------------------|-----------------|
| All species             | 105                | 97           | 52    | 16    | 188.6                                                              | (145.1, 279.6)  |
| Described species       | 30                 | 76           | 9     | 5     | 38.0 (19.39%)                                                      | (31.8, 65.1)    |
| Undescribed/new species | 75                 | 79           | 43    | 11    | 158.0 (80.61%)                                                     | (111.2, 265.1)  |

TABLE S8 (Asia) The *Chao2* estimates based on locality by species incidence matrix

| Asia                       | Observed<br>species # | Localities<br># | $Q_1$ | $Q_2$ | The <i>Chao2</i> estimate<br>(percentage of<br>described/undescribed) | 95% C. I. range |
|----------------------------|-----------------------|-----------------|-------|-------|-----------------------------------------------------------------------|-----------------|
| All species                | 225                   | 110             | 144   | 42    | 469.6                                                                 | (380.0, 611.0)  |
| Described species          | 44                    | 85              | 20    | 7     | 72.2 (15.35%)                                                         | (53.3, 129.7)   |
| Undescribed/new<br>species | 181                   | 102             | 124   | 35    | 398.5 (84.65%)                                                        | (313.8, 537.2)  |

TABLE S9 (Subtropical and Mediterranean) The *Chao2* estimates based on locality by  
species incidence matrix

| Subtropical &<br>Mediterranean | Observed<br>species # | Localities<br># | $Q_1$ | $Q_2$ | The <i>Chao2</i> estimate<br>(percentage of<br>described/undescribed) | 95% C. I. range |
|--------------------------------|-----------------------|-----------------|-------|-------|-----------------------------------------------------------------------|-----------------|
| All species                    | 38                    | 71              | 20    | 5     | 77.4                                                                  | (50.3, 164.7)   |
| Described species              | 18                    | 42              | 6     | 4     | 22.4 (16.33%)                                                         | (18.8, 42.3)    |
| Undescribed/new<br>species     | 20                    | 30              | 14    | 1     | 114.7 (83.67%)*                                                       | (35.9, 585.7)*  |

\*Unstable estimate and wide confidence interval due to sparse data (only one duplicate)

TABLE S10 (Caribbean) The *Chao2* estimates based on locality by species incidence matrix

| Caribbean               | Observed species # | Localities # | $Q_1$ | $Q_2$ | The <i>Chao2</i> estimate<br>(percentage of described/undescribed) | 95% C. I. range |
|-------------------------|--------------------|--------------|-------|-------|--------------------------------------------------------------------|-----------------|
| All species             | 79                 | 62           | 43    | 17    | 132.5                                                              | (103.6, 195.5)  |
| Described species       | 18                 | 51           | 4     | 6     | 19.3 (13.05%)                                                      | (18.2, 28.0)    |
| Undescribed/new species | 61                 | 47           | 39    | 11    | 128.7 (86.95%)                                                     | (89.9, 219.7)   |

TABLE S11 (South America) The *Chao2* estimates based on date by species incidence matrix

| South America           | Observed Species # | Days # | $Q_1$ | $Q_2$ | The <i>Chao2</i> estimate<br>(percentage of described/undescribed) | 95% C. I. range |
|-------------------------|--------------------|--------|-------|-------|--------------------------------------------------------------------|-----------------|
| All species             | 242                | 132    | 99    | 67    | 314.6                                                              | (285.7, 362.5)  |
| Described species       | 62                 | 117    | 14    | 20    | 66.9 (20.69%)                                                      | (63.3, 79.6)    |
| Undescribed/new species | 180                | 124    | 85    | 47    | 256.2 (79.31%)                                                     | (224.1, 311.9)  |

TABLE S12 (Africa) The *Chao2* estimates based on date by species incidence matrix

| Africa                     | Observed<br>Species # | Days<br># | $Q_1$ | $Q_2$ | The <i>Chao2</i> estimate<br>(percentage of<br>described/undescribed) | 95% C. I. range |
|----------------------------|-----------------------|-----------|-------|-------|-----------------------------------------------------------------------|-----------------|
| All species                | 105                   | 98        | 44    | 22    | 148.6                                                                 | (125.5, 197.5)  |
| Described species          | 30                    | 83        | 6     | 6     | 33.0 (21.61%)                                                         | (30.5, 46.6)    |
| Undescribed/new<br>species | 75                    | 78        | 38    | 16    | 119.5 (78.39%)                                                        | (94.7, 175.9)   |

TABLE S13 (Asia) The *Chao2* estimates based on date by species incidence matrix

| Asia                       | Observed<br>Species # | Days | $Q_1$ | $Q_2$ | The <i>Chao2</i> estimate<br>(percentage of<br>described/undescribed) | 95% C. I. range |
|----------------------------|-----------------------|------|-------|-------|-----------------------------------------------------------------------|-----------------|
| All species                | 225                   | 114  | 133   | 50    | 400.3                                                                 | (336.0, 501.8)  |
| Described species          | 44                    | 88   | 20    | 6     | 77.0 (19.16%)                                                         | (54.6, 146.4)   |
| Undescribed/new<br>species | 181                   | 108  | 113   | 44    | 324.8 (80.84%)                                                        | (268.9, 416.2)  |

TABLE S14 (Subtropical and Mediterranean) The *Chao2* estimates based on date by species incidence matrix

| Subtropical & Mediterranean | Observed Species # | Days # | $Q_1$ | $Q_2$ | The <i>Chao2</i> estimate<br>(percentage of described/undescribed) | 95% C. I. range |
|-----------------------------|--------------------|--------|-------|-------|--------------------------------------------------------------------|-----------------|
| All species                 | 38                 | 47     | 19    | 8     | 60.1                                                               | (45.3, 105.2)   |
| Described species           | 18                 | 30     | 7     | 3     | 25.9 (43.40%)                                                      | (19.5, 59.1)    |
| Undescribed/new species     | 20                 | 23     | 12    | 5     | 33.8 (56.60%)                                                      | (23.6, 73.1)    |

TABLE S15 (Caribbean) The *Chao2* estimates based on date by species incidence matrix.

| Caribbean               | Observed Species # | Days # | $Q_1$ | $Q_2$ | The <i>Chao2</i> estimate<br>(percentage of described/undescribed) | 95% C. I. range |
|-------------------------|--------------------|--------|-------|-------|--------------------------------------------------------------------|-----------------|
| All species             | 79                 | 58     | 36    | 14    | 124.5                                                              | (98.5, 184.9)   |
| Described species       | 18                 | 50     | 4     | 4     | 20.0 (15.21%)                                                      | (18.3, 32.1)    |
| Undescribed/new species | 61                 | 53     | 32    | 10    | 111.2 (84.79%)                                                     | (81.1, 186.7)   |

## APPENDIX

### Complete incidence-based frequency counts in each geographic regions

#### Locality by species data

( $T$ : number of localities,  $Q_i$ : number of species that were detected in  $i$  localities)

Raw data are listed in tables S1–S5.

1. See table S6 for the *Chao2* estimate and 95% confidence interval

| <b>South America</b> | $T$ | $i =$   | 1   | 2  | 3  | 4  | 5 | 6 | 7 | 8 | 9 | 11 | 12 | 13 | 14 | 16 | 20 | 22 |
|----------------------|-----|---------|-----|----|----|----|---|---|---|---|---|----|----|----|----|----|----|----|
| All                  | 101 | $Q_i =$ | 141 | 44 | 21 | 15 | 3 | 2 | 5 | 1 | 2 | 1  | 1  | 2  | 1  | 1  | 1  | 1  |
| Described            | 87  | $Q_i =$ | 23  | 17 | 7  | 3  | 2 | 1 | 1 | 1 | 2 | 0  | 1  | 0  | 1  | 1  | 1  | 1  |
| Undescribed/new      | 95  | $Q_i =$ | 118 | 27 | 14 | 12 | 1 | 1 | 4 | 0 | 0 | 1  | 0  | 2  | 0  | 0  | 0  | 0  |

2. See table S7 for the *Chao2* estimate and 95% confidence interval

| <b>Africa</b>   | $T$ | $i =$   | 1  | 2  | 3 | 4 | 5 | 6 | 9 | 10 | 11 | 12 | 13 |
|-----------------|-----|---------|----|----|---|---|---|---|---|----|----|----|----|
| All             | 97  | $Q_i =$ | 52 | 16 | 9 | 7 | 3 | 8 | 3 | 1  | 1  | 2  | 1  |
| Described       | 76  | $Q_i =$ | 9  | 5  | 3 | 2 | 1 | 4 | 1 | 1  | 0  | 1  | 1  |
| Undescribed/new | 79  | $Q_i =$ | 43 | 11 | 6 | 5 | 2 | 4 | 2 | 0  | 1  | 1  | 0  |

3. See table S8 for the *Chao2* estimate and 95% confidence interval

| <b>Asia</b>     | $T$ | $i =$   | 1   | 2  | 3 | 4 | 5  | 6 | 7 | 8 | 10 | 11 | 12 |
|-----------------|-----|---------|-----|----|---|---|----|---|---|---|----|----|----|
| All             | 110 | $Q_i =$ | 144 | 42 | 9 | 8 | 10 | 1 | 5 | 1 | 1  | 2  | 1  |
| Described       | 85  | $Q_i =$ | 20  | 7  | 2 | 5 | 5  | 0 | 2 | 0 | 0  | 1  | 1  |
| Undescribed/new | 102 | $Q_i =$ | 124 | 35 | 7 | 3 | 5  | 1 | 3 | 1 | 1  | 1  | 0  |

4. See table S9 for the *Chao2* estimate and 95% confidence interval

| <b>Subtropical &amp; Mediterranean</b> | <i>T</i> | <i>i</i> = | 1  | 2 | 3 | 4 | 5 | 6 | 11 |
|----------------------------------------|----------|------------|----|---|---|---|---|---|----|
| All                                    | 71       | $Q_i =$    | 20 | 5 | 6 | 1 | 4 | 1 | 1  |
| Described                              | 42       | $Q_i =$    | 6  | 4 | 3 | 1 | 3 | 1 | 0  |
| Undescribed/new                        | 30       | $Q_i =$    | 14 | 1 | 3 | 0 | 1 | 0 | 1  |

5. See table S10 for the *Chao2* estimate and 95% confidence interval

| <b>Caribbean</b> | <i>T</i> | <i>i</i> = | 1  | 2  | 3 | 4 | 5 | 6 | 7 | 10 | 12 | 13 | 15 |
|------------------|----------|------------|----|----|---|---|---|---|---|----|----|----|----|
| All              | 62       | $Q_i =$    | 43 | 17 | 8 | 2 | 3 | 1 | 1 | 1  | 1  | 1  | 1  |
| Described        | 51       | $Q_i =$    | 4  | 6  | 2 | 0 | 2 | 0 | 0 | 1  | 1  | 1  | 1  |
| Undescribed/new  | 47       | $Q_i =$    | 39 | 11 | 6 | 2 | 1 | 1 | 1 | 0  | 0  | 0  | 0  |



## Date by species data

( $T$ : number of days,  $Q_i$ : number of species that were detected in  $i$  sampling days)

Raw data are listed in tables S1–S5.

1. See table S11 for the *Chao2* estimate and 95% confidence interval

| <b>South America</b> | $T$ | $i =$   | 1  | 2  | 3  | 4  | 5  | 6 | 7 | 8 | 9 | 12 | 13 | 14 | 20 | 21 | 22 | 23 | 24 |
|----------------------|-----|---------|----|----|----|----|----|---|---|---|---|----|----|----|----|----|----|----|----|
| All                  | 132 | $Q_i =$ | 99 | 67 | 26 | 17 | 10 | 4 | 2 | 4 | 3 | 2  | 2  | 1  | 1  | 1  | 1  | 1  | 1  |
| Described            | 117 | $Q_i =$ | 14 | 20 | 8  | 4  | 2  | 2 | 2 | 2 | 1 | 2  | 0  | 1  | 0  | 1  | 1  | 1  | 1  |
| Undescribed/new      | 124 | $Q_i =$ | 85 | 47 | 18 | 13 | 8  | 2 | 0 | 2 | 2 | 0  | 2  | 0  | 1  | 0  | 0  | 0  | 0  |

2. See table S12 for the *Chao2* estimate and 95% confidence interval

| <b>Africa</b>   | $T$ | $i =$   | 1  | 2  | 3  | 4 | 5 | 6 | 7 | 8 | 9 | 10 | 11 | 12 | 15 | 19 |
|-----------------|-----|---------|----|----|----|---|---|---|---|---|---|----|----|----|----|----|
| All             | 98  | $Q_i =$ | 44 | 22 | 10 | 5 | 4 | 7 | 1 | 3 | 1 | 2  | 1  | 2  | 2  | 1  |
| Described       | 83  | $Q_i =$ | 6  | 6  | 5  | 2 | 2 | 2 | 0 | 0 | 1 | 1  | 1  | 1  | 2  | 1  |
| Undescribed/new | 78  | $Q_i =$ | 38 | 16 | 5  | 3 | 2 | 5 | 1 | 3 | 0 | 1  | 0  | 1  | 0  | 0  |

3. See table S13 for the *Chao2* estimate and 95% confidence interval

| <b>Asia</b>     | $T$ | $i =$   | 1   | 2  | 3  | 4 | 5 | 6 | 7 | 8 | 9 | 10 | 13 | 14 | 23 |
|-----------------|-----|---------|-----|----|----|---|---|---|---|---|---|----|----|----|----|
| All             | 114 | $Q_i =$ | 133 | 50 | 13 | 6 | 9 | 3 | 4 | 1 | 1 | 1  | 1  | 2  | 1  |
| Described       | 88  | $Q_i =$ | 20  | 6  | 4  | 3 | 3 | 2 | 2 | 0 | 1 | 1  | 0  | 1  | 1  |
| Undescribed/new | 108 | $Q_i =$ | 113 | 44 | 9  | 3 | 6 | 1 | 2 | 1 | 0 | 0  | 1  | 1  | 0  |

4. See table S14 for the *Chao2* estimate and 95% confidence interval

| <b>Subtropical &amp; Mediterranean</b> | <i>T</i> | <i>i</i> = | 1  | 2 | 3 | 4 | 5 | 8 |
|----------------------------------------|----------|------------|----|---|---|---|---|---|
| All                                    | 47       | $Q_i =$    | 19 | 8 | 7 | 1 | 2 | 1 |
| Described                              | 30       | $Q_i =$    | 7  | 3 | 5 | 1 | 2 | 0 |
| Undescribed/new                        | 23       | $Q_i =$    | 12 | 5 | 2 | 0 | 0 | 1 |

5. See table S15 for the *Chao2* estimate and 95% confidence interval

| <b>Caribbean</b> | <i>T</i> | <i>i</i> = | 1  | 2  | 3 | 4 | 5 | 6 | 8 | 9 | 11 | 12 | 17 |
|------------------|----------|------------|----|----|---|---|---|---|---|---|----|----|----|
| All              | 58       | $Q_i =$    | 36 | 14 | 9 | 6 | 5 | 3 | 2 | 1 | 1  | 1  | 1  |
| Described        | 50       | $Q_i =$    | 4  | 4  | 1 | 1 | 2 | 0 | 2 | 1 | 1  | 1  | 1  |
| Undescribed/new  | 53       | $Q_i =$    | 32 | 10 | 8 | 5 | 3 | 3 | 0 | 0 | 0  | 0  | 0  |
